# Supplementary material for: Home-Based Outpatient Telepsychiatry to Improve Adherence With Treatment Appointments: A Pilot Study
Source: Atypon-hosted journal article supplement (doi:10.1176/appi.ps.201600244), 2017-03-01
Supplement: appi.ps.201600244.ds001.pdf [file appi.ps.201600244.ds001.pdf]

## E- Appendix

Table 2: Provider Concerns Survey Results (N= 31)

| <b>Provider Concerns</b>                                            | <b>Disagree</b> | <b>Neither<br/>Disagree Nor<br/>Agree</b> | <b>Agree</b> |
|---------------------------------------------------------------------|-----------------|-------------------------------------------|--------------|
| negative impact on doctor-patient relationship and communication    | 40%             | 33%                                       | 27%          |
| technical issues (computer problems, difficult to use programs etc) | 10%             | 7%                                        | 83%          |
| safety issues                                                       | 26%             | 35%                                       | 39%          |
| extra hassle involved                                               | 28%             | 7%                                        | 66%          |

Table 3: Patient Survey Results (N= 20)

| Survey Question Response (N)                                       | Telepsychiatry<br>(N 10) | Treatment as Usual<br>(N 10) |
|--------------------------------------------------------------------|--------------------------|------------------------------|
| Very or somewhat satisfied with care                               | 10                       | 10                           |
| Very or somewhat satisfied with doctor                             | 9                        | 10                           |
| Very or somewhat satisfied that my doctor<br>understands my issues | 8                        | 9                            |
| Very or somewhat likely to recommend                               | 10                       | 10                           |
| No or minor difficulty scheduling appointments                     | 10                       | 10                           |
| No or minor difficulty keeping appointments                        | 10                       | 4                            |
| Never or rarely missed due to inconvenience                        | 9                        | 9                            |
